# Supplementary material for: Visual assessment of dynamic knee joint alignment in patients with patellofemoral pain: an agreement study
Source: PeerJ. 2021 Oct 19;9:e12203. doi: 10.7717/peerj.12203 (PMC8532969; doi:10.7717/peerj.12203)
Supplement: Supplemental Information 2 [file peerj-09-12203-s002.xlsx]

## Sheet: Ark1
ID	SLS rater 1	SLS rater 1 (re-assessment)	SLS rater 2	FL rater 1	FL rater 1 (re-assessment)	FL rater 2				SLS rater 1	SLS rater 1 (re-assessment)	SLS rater 2	FL rater 1	FL rater 1 (re-assessment)	FL rater 2
1	-3	-3	-3	-1	-1	-2				Valgus	Valgus	Valgus	Normal	Normal	Valgus
2	-3	-3	-3	-1	-2	-2				Valgus	Valgus	Valgus	Normal	Valgus	Valgus
3	-3	-3	-3	-2	-1	-1				Valgus	Valgus	Valgus	Valgus	Normal	Normal
4	-3	-4	-3	-3	-3	-3				Valgus	Valgus	Valgus	Valgus	Valgus	Valgus
5	-2	-2	-2	-3	-3	-2				Valgus	Valgus	Valgus	Valgus	Valgus	Valgus
6	-1	-2	-1	-1	-3	-1				Normal	Valgus	Normal	Normal	Valgus	Normal
7	-3	-4	-4	-1	-1	-1				Valgus	Valgus	Valgus	Normal	Normal	Normal
8	0	0	0	0	0	0				Normal	Normal	Normal	Normal	Normal	Normal
9	-2	-3	-3	-1	-2	-2				Valgus	Valgus	Valgus	Normal	Valgus	Valgus
10	-2	-2	-2	-1	-1	-2				Valgus	Valgus	Valgus	Normal	Normal	Valgus
11	-2	-3	-3	-2	-3	-1				Valgus	Valgus	Valgus	Valgus	Valgus	Normal
12	-4	-4	-4	-4	-3	-3				Valgus	Valgus	Valgus	Valgus	Valgus	Valgus
13	-2	-2	-3	0	-1	-2				Valgus	Valgus	Valgus	Normal	Normal	Valgus
14	-1	0	-1	-2	-1	-2				Normal	Normal	Normal	Valgus	Normal	Valgus
15	0	-1	-2	0	-1	-3				Normal	Normal	Valgus	Normal	Normal	Valgus
16	-3	-3	-3	-3	-3	-3				Valgus	Valgus	Valgus	Valgus	Valgus	Valgus
17	-1	-2	-2	0	0	0				Normal	Valgus	Valgus	Normal	Normal	Normal
18	0	-2	-2	0	0	-1				Normal	Valgus	Valgus	Normal	Normal	Normal
19	-1	-1	-2	0	-1	-1				Normal	Normal	Valgus	Normal	Normal	Normal
20	0	0	-2	0	0	-1				Normal	Normal	Valgus	Normal	Normal	Normal
21	0	1	-2	0	0	-1				Normal	Normal	Valgus	Normal	Normal	Normal
22	-2	-1	-2	-1	-1	0				Valgus	Normal	Valgus	Normal	Normal	Normal
23	0	0	0	-1	-2	-1				Normal	Normal	Normal	Normal	Valgus	Normal
24	-1	-1	-2	0	0	0				Normal	Normal	Valgus	Normal	Normal	Normal
25	-4	-4	-3	0	-2	-1				Valgus	Valgus	Valgus	Normal	Valgus	Normal
26	-3	-3	-3	-1	-1	-1				Valgus	Valgus	Valgus	Normal	Normal	Normal
27	-3	-3	-3	-1	-1	-1				Valgus	Valgus	Valgus	Normal	Normal	Normal
28	-2	-1	-1	0	0	-2				Valgus	Normal	Normal	Normal	Normal	Valgus
29	-2	-3	-1	0	0	0				Valgus	Valgus	Normal	Normal	Normal	Normal
30	-1	-1	-1	0	0	0				Normal	Normal	Normal	Normal	Normal	Normal
31	-1	-1	0	0	0	0				Normal	Normal	Normal	Normal	Normal	Normal
32	0	-1	1	-1	-1	0				Normal	Normal	Normal	Normal	Normal	Normal
33	-3	-2	-1	-2	-1	-1				Valgus	Valgus	Normal	Valgus	Normal	Normal
34	-3	-1	-3	-2	0	-2				Valgus	Normal	Valgus	Valgus	Normal	Valgus
35	-1	-1	-2	-1	-1	-1				Normal	Normal	Valgus	Normal	Normal	Normal
36	-3	-3	-2	-3	-2	-2				Valgus	Valgus	Valgus	Valgus	Valgus	Valgus
37	-4	-4	-3	-3	-2	-2				Valgus	Valgus	Valgus	Valgus	Valgus	Valgus
38	-2	-1	-1	-1	0	0				Valgus	Normal	Normal	Normal	Normal	Normal
39	-2	-2	-1	0	0	1				Valgus	Valgus	Normal	Normal	Normal	Normal
40	-3	-3	-2	-4	-4	-3				Valgus	Valgus	Valgus	Valgus	Valgus	Valgus
41	-3	-2	-1	-1	-1	-1				Valgus	Valgus	Normal	Normal	Normal	Normal
42	-2	-2	-1	-3	-3	-3				Valgus	Valgus	Normal	Valgus	Valgus	Valgus
43	-3	-3	-2	-3	-3	-1				Valgus	Valgus	Valgus	Valgus	Valgus	Normal
44	-4	-3	0	-2	-2	-3				Valgus	Valgus	Normal	Valgus	Valgus	Valgus
45	-4	-4	-2	-4	-3	-3				Valgus	Valgus	Valgus	Valgus	Valgus	Valgus
46	0	-1	-1	0	0	0				Normal	Normal	Normal	Normal	Normal	Normal
47	-4	-4	-3	-2	-3	-3				Valgus	Valgus	Valgus	Valgus	Valgus	Valgus
48	0	-1	-1	-1	-2	-1				Normal	Normal	Normal	Normal	Valgus	Normal
49	-3	-3	-1	0	0	0				Valgus	Valgus	Normal	Normal	Normal	Normal
50	-2	-3	-1	-2	-2	-1				Valgus	Valgus	Normal	Valgus	Valgus	Normal
51	-2	-2	-1	-2	-1	-2				Valgus	Valgus	Normal	Valgus	Normal	Valgus
52	-1	-1	-3	-1	0	-1				Normal	Normal	Valgus	Normal	Normal	Normal
53	-3	-2	-1	0	0	0				Valgus	Valgus	Normal	Normal	Normal	Normal
54	-2	-2	-3	-1	-1	-1				Valgus	Valgus	Valgus	Normal	Normal	Normal
55	-3	-2	-2	-2	-2	-1				Valgus	Valgus	Valgus	Valgus	Valgus	Normal
56	-2	-2	-3	-1	-2	-2				Valgus	Valgus	Valgus	Normal	Valgus	Valgus
57	-3	-3	-3	-2	-3	-1				Valgus	Valgus	Valgus	Valgus	Valgus	Normal
58	-3	-4	-4	-3	-3	-3				Valgus	Valgus	Valgus	Valgus	Valgus	Valgus
59	-2	-1	-2	-2	-2	-2				Valgus	Normal	Valgus	Valgus	Valgus	Valgus
60	-1	0	-1	0	0	0				Normal	Normal	Normal	Normal	Normal	Normal

## Sheet: Ark2
record_id	knee_align_ms	knee_align_fl	knee_align_ms_2	knee_align_fl_2
1	-3	-1	-3	-2
2	-3	-1	-3	-2
3	-3	-2	-3	-1
4	-3	-3	-3	-3
5	-2	-3	-2	-2
6	-1	-1	-1	-1
7	-3	-1	-4	-1
8	0	0	0	0
9	-2	-1	-3	-2
10	-2	-1	-2	-2
11	-2	-2	-3	-1
12	-4	-4	-4	-3
13	-2	0	-3	-2
14	-1	-2	-1	-2
15	0	0	-2	-3
16	-3	-3	-3	-3
17	-1	0	-2	0
18	0	0	-2	-1
19	-1	0	-2	-1
20	0	0	-2	-1
21	0	0	-2	-1
22	-2	-1	-2	0
23	0	-1	0	-1
24	-1	0	-2	0
25	-4	0	-3	-1
26	-3	-1	-3	-1
27	-3	-1	-3	-1
28	-2	0	-1	-2
29	-2	0	-1	0
30	-1	0	-1	0
31	-1	0	0	0
32	0	-1	1	0
33	-3	-2	-1	-1
34	-3	-2	-3	-2
35	-1	-1	-2	-1
36	-3	-3	-2	-2
37	-4	-3	-3	-2
38	-2	-1	-1	0
39	-2	0	-1	1
40	-3	-4	-2	-3
41	-3	-1	-1	-1
42	-2	-3	-1	-3
43	-3	-3	-2	-1
44	-4	-2	0	-3
45	-4	-4	-2	-3
46	0	0	-1	0
47	-4	-2	-3	-3
48	0	-1	-1	-1
49	-3	0	-1	0
50	-2	-2	-1	-1
51	-2	-2	-1	-2
52	-1	-1	-3	-1
53	-3	0	-1	0
54	-2	-1	-3	-1
55	-3	-2	-2	-1
56	-2	-1	-3	-2
57	-3	-2	-3	-1
58	-3	-3	-4	-3
59	-2	-2	-2	-2
60	-1	0	-1	0
